# Supplementary material for: Elucidating the invasion history of introduced bullfrogs in New Mexico using population genetic approaches
Source: PeerJ. 2026 Jan 9;14:e20491. doi: 10.7717/peerj.20491 (PMC12794634; doi:10.7717/peerj.20491)
Supplement: Supplemental Information 2 — This file contains Metadata of all New Mexico specimens used in this study from the Museum of Southwestern Biology. The file also contains links to the Arctos museum database where all information is readily available. The first sheet within the file contains important data for each specimen. Definitions of column headers are included on the second sheet. [file peerj-14-20491-s002.xlsx]

## Sheet: Sample_data
Supporting information for manuscript submitted to Biological Invasions
Elucidating the invasion history of introduced bullfrogs in New Mexico using population genetic approaches Celina M. Eberle¹*, ceberle17@unm.edu; https://orcid.org/0009-0001-5857-2445 Daniele L. F. Wiley¹, dwiley7@unm.edu; https://orcid.org/0000-0003-0042-0825 Chris X. McDaniels¹, cmcdaniels1@unm.edu: https://orcid.org/0009-0004-1683-2423 J. Tomasz Giermakowski¹, tomas@unm.edu; https://orcid.org/…
Table S1. This file contains Metadata of all New Mexico specimens used in this study from the Museum of Southwestern Biology. The file also contains links to the Arctos museum database where all information is readily available. The first sheet within the file contains important data for each specimen. Definitions of column headers are included on the second sheet.
use_license_url	hyperlink	collection_object_id	guid	scientific_name	othercatalognumbers	state_prov	spec_locality	verbatim_date	dec_lat	dec_long	parts	verbatim_locality	day_collected	month_collected	year_collected	county	Genbank_id	Lineage
http://arctosdb.org/home/data/; http://creativecommons.org/licenses/by-nc/3.0	https://arctos.database.museum/guid/MSB:Herp:98542	27293501	MSB:Herp:98542	Rana catesbeiana		New Mexico	Chiricahua Desert Museum, Rodeo, NM	9/29 and then on 10/01	31.8704	-109.035	liver (frozen); whole organism (isopropanol 40%)	Chiricahua Desert Museum in Rodeo, NM			2017	Hidalgo County	PV262016	1
http://arctosdb.org/home/data/; http://creativecommons.org/licenses/by-nc/3.0	https://arctos.database.museum/guid/MSB:Herp:98544	27293507	MSB:Herp:98544	Rana catesbeiana		New Mexico	Chiricahua Desert Museum, Rodeo, NM	9/29 and then on 10/01	31.8704	-109.035	liver (frozen); whole organism (isopropanol 40%)	Chiricahua Desert Museum in Rodeo, NM			2017	Hidalgo County	PV262017	1
http://arctosdb.org/home/data/; http://creativecommons.org/licenses/by-nc/3.0	https://arctos.database.museum/guid/MSB:Herp:98545	27293510	MSB:Herp:98545	Rana catesbeiana		New Mexico	Chiricahua Desert Museum, Rodeo, NM	9/29 and then on 10/01	31.8704	-109.035	liver (frozen); whole organism (isopropanol 40%)	Chiricahua Desert Museum in Rodeo, NM			2017	Hidalgo County	PV262018	1
http://arctosdb.org/home/data/; http://creativecommons.org/licenses/by-nc/3.0	https://arctos.database.museum/guid/MSB:Herp:98540	27293513	MSB:Herp:98540	Rana catesbeiana		New Mexico	Chiricahua Desert Museum, Rodeo, NM	9/29 and then on 10/01	31.8704	-109.035	liver (frozen); whole organism (isopropanol 40%)	Chiricahua Desert Museum in Rodeo, NM			2017	Hidalgo County	PV262015	1
http://arctosdb.org/home/data/; http://creativecommons.org/licenses/by-nc/3.0	https://arctos.database.museum/guid/MSB:Herp:98546	27293519	MSB:Herp:98546	Rana catesbeiana		New Mexico	Chiricahua Desert Museum, Rodeo, NM	9/29 and then on 10/01	31.8704	-109.035	liver (frozen); whole organism (isopropanol 40%)	Chiricahua Desert Museum in Rodeo, NM			2017	Hidalgo County	PV262019	1
http://arctosdb.org/home/data/; http://creativecommons.org/licenses/by-nc/3.0	https://arctos.database.museum/guid/MSB:Herp:98547	27293522	MSB:Herp:98547	Rana catesbeiana		New Mexico	Chiricahua Desert Museum, Rodeo, NM	9/29 and then on 10/01	31.8704	-109.035	liver (frozen); whole organism (isopropanol 40%)	Chiricahua Desert Museum in Rodeo, NM			2017	Hidalgo County	PV262020	1
http://arctosdb.org/home/data/; http://creativecommons.org/licenses/by-nc/3.0	https://arctos.database.museum/guid/MSB:Herp:98548	27293525	MSB:Herp:98548	Rana catesbeiana		New Mexico	Chiricahua Desert Museum, Rodeo, NM	9/29 and then on 10/01	31.8704	-109.035	liver (frozen); whole organism (isopropanol 40%)	Chiricahua Desert Museum in Rodeo, NM			2017	Hidalgo County	PV262021	1
http://arctosdb.org/home/data/; http://creativecommons.org/licenses/by-nc/3.0	https://arctos.database.museum/guid/MSB:Herp:98549	27293528	MSB:Herp:98549	Rana catesbeiana		New Mexico	Chiricahua Desert Museum, Rodeo, NM	9/29 and then on 10/01	31.8704	-109.035	liver (frozen); whole organism (isopropanol 40%)	Chiricahua Desert Museum in Rodeo, NM			2017	Hidalgo County	PV262022	1
http://arctosdb.org/home/data/; http://creativecommons.org/licenses/by-nc/3.0	https://arctos.database.museum/guid/MSB:Herp:98551	27293534	MSB:Herp:98551	Rana catesbeiana		New Mexico	Chiricahua Desert Museum, Rodeo, NM	9/29 and then on 10/01	31.8704	-109.035	liver (frozen); whole organism (isopropanol 40%)	Chiricahua Desert Museum in Rodeo, NM			2017	Hidalgo County	PV262023	1
http://arctosdb.org/home/data/; http://creativecommons.org/licenses/by-nc/3.0	https://arctos.database.museum/guid/MSB:Herp:98552	27293537	MSB:Herp:98552	Rana catesbeiana		New Mexico	Chiricahua Desert Museum, Rodeo, NM	9/29 and then on 10/01	31.8704	-109.035	liver (frozen); whole organism (isopropanol 40%)	Chiricahua Desert Museum in Rodeo, NM			2017	Hidalgo County	PV262024	1
http://arctosdb.org/home/data/; http://creativecommons.org/licenses/by-nc/3.0	https://arctos.database.museum/guid/MSB:Herp:98553	27293540	MSB:Herp:98553	Rana catesbeiana		New Mexico	Chiricahua Desert Museum, Rodeo, NM	9/29 and then on 10/01	31.8704	-109.035	liver (frozen); whole organism (isopropanol 40%)	Chiricahua Desert Museum in Rodeo, NM			2017	Hidalgo County	PV262025	1
http://arctosdb.org/home/data/; http://creativecommons.org/licenses/by-nc/3.0	https://arctos.database.museum/guid/MSB:Herp:98557	27293552	MSB:Herp:98557	Rana catesbeiana		New Mexico	Chiricahua Desert Museum, Rodeo, NM	9/29 and then on 10/01	31.8704	-109.035	liver (frozen); whole organism (isopropanol 40%)	Chiricahua Desert Museum in Rodeo, NM			2017	Hidalgo County	PV262026	1
http://arctosdb.org/home/data/; http://creativecommons.org/licenses/by-nc/3.0	https://arctos.database.museum/guid/MSB:Herp:98559	27293555	MSB:Herp:98559	Rana catesbeiana		New Mexico	Chiricahua Desert Museum, Rodeo, NM	9/29 and then on 10/01	31.8704	-109.035	liver (frozen); whole organism (isopropanol 40%)	Chiricahua Desert Museum in Rodeo, NM			2017	Hidalgo County	PV262028	1
http://arctosdb.org/home/data/; http://creativecommons.org/licenses/by-nc/3.0	https://arctos.database.museum/guid/MSB:Herp:98558	27293722	MSB:Herp:98558	Rana catesbeiana		New Mexico	Chiricahua Desert Museum, Rodeo, NM	9/29 and then on 10/01	31.8704	-109.035	liver (frozen); whole organism (isopropanol 40%)	Chiricahua Desert Museum in Rodeo, NM			2017	Hidalgo County	PV262027	1
http://arctosdb.org/home/data/; http://creativecommons.org/licenses/by-nc/3.0	https://arctos.database.museum/guid/MSB:Herp:98869	27518591	MSB:Herp:98869	Rana catesbeiana	collector number JTG 593	New Mexico	Near confluence of West Fork of Gila River and Little Creek	2016-04-08	33.2031	-108.215	liver (ethanol 95%); whole organism	verbatim locality not recorded	8	4	2016	Catron County	PV261981	1
http://arctosdb.org/home/data/; http://creativecommons.org/licenses/by-nc/3.0	https://arctos.database.museum/guid/MSB:Herp:78481	27727656	MSB:Herp:78481	Rana catesbeiana	collector number BLC 753	New Mexico	Mora River at I-25 Watros	2010-05-10	35.7833	-104.99	toe (ethanol 95%); unknown	Mora River at I-25 Watros	10	5	2010	Mora County	PV261955	1
http://arctosdb.org/home/data/; http://creativecommons.org/licenses/by-nc/3.0	https://arctos.database.museum/guid/MSB:Herp:96257	28113435	MSB:Herp:96257	Rana catesbeiana	collector number MJR 595	New Mexico	265 m S of Gila Visitor Center, on Gila Cliff Dwelling Visitor Center Rd.	2014-09-11	33.2215	-108.242	liver (frozen); whole organism (isopropanol 40%)	N/A	11	9	2014	Catron County	PV262012	1
http://arctosdb.org/home/data/; http://creativecommons.org/licenses/by-nc/3.0	https://arctos.database.museum/guid/MSB:Herp:95375	28113562	MSB:Herp:95375	Rana catesbeiana	collector number MJR 594	New Mexico	Bridge	2014-09-11	33.2215	-108.242	tissue (frozen); whole organism (isopropanol 55%)	Bridge	11	9	2014	Catron County	PV262011	1
http://arctosdb.org/home/data/; http://creativecommons.org/licenses/by-nc/3.0	https://arctos.database.museum/guid/MSB:Herp:95308	28113564	MSB:Herp:95308	Rana catesbeiana	collector number MJR 596	New Mexico	Bridge	2014-09-11	33.2215	-108.242	tissue (frozen); whole organism (isopropanol 55%)	Bridge	11	9	2014	Catron County	PV262013	1
http://arctosdb.org/home/data/; http://creativecommons.org/licenses/by-nc/3.0	https://arctos.database.museum/guid/MSB:Herp:95307	28113566	MSB:Herp:95307	Rana catesbeiana	collector number MJR 597	New Mexico	Heart Bar pond	2014-09-11	33.2027	-108.217	liver (frozen); whole organism (isopropanol 55%)	Heart Bar pond	11	9	2014	Catron County	PV262014	1
http://arctosdb.org/home/data/; http://creativecommons.org/licenses/by-nc/3.0	https://arctos.database.museum/guid/MSB:Herp:95377	28113569	MSB:Herp:95377	Rana catesbeiana	collector number MJR 592	New Mexico	Little Creek	2014-09-11	33.1943	-108.221	tissue (frozen); whole organism (isopropanol 55%)	Little Creek	11	9	2014	Grant County	PV262009	1
http://arctosdb.org/home/data/; http://creativecommons.org/licenses/by-nc/3.0	https://arctos.database.museum/guid/MSB:Herp:95376	28113571	MSB:Herp:95376	Rana catesbeiana	collector number MJR 593	New Mexico	Little Creek	2014-09-11	33.1943	-108.221	tissue (frozen); whole organism (isopropanol 55%)	Little Creek	11	9	2014	Grant County	PV262010	1
http://arctosdb.org/home/data/; http://creativecommons.org/licenses/by-nc/3.0	https://arctos.database.museum/guid/MSB:Herp:99595	28198662	MSB:Herp:99595	Rana catesbeiana	collector number JTG 678	New Mexico	Gila National Forest, East Fork Gila River, on river ~535 ft SW from bridge junction where Forest Road 225 and Forest Road 18 meet.	2018-06-14	33.3011	-108.126	tissue (ethanol 95%)	Gila National Forest, East Fork Gila River, on river ~535 ft SW from bridge junction where Forest Road 225 and Forest Road 18 meet.	14	6	2018	Catron County	PV261982	1
http://arctosdb.org/home/data/; http://creativecommons.org/licenses/by-nc/3.0	https://arctos.database.museum/guid/MSB:Herp:100267	28815357	MSB:Herp:100267	Rana catesbeiana	collector number BLC 1079	New Mexico	Off channel pool, Bear Creek	25 Apr [2019] 1930-2200	32.9718	-108.504	liver (ethanol 95%); whole organism (isopropanol 55%)	Bear Cr, offchannel pool	25	4	2019	Grant County	PV261957	1
http://arctosdb.org/home/data/; http://creativecommons.org/licenses/by-nc/3.0	https://arctos.database.museum/guid/MSB:Herp:100406	28840056	MSB:Herp:100406	Rana catesbeiana	collector number JTG 715	New Mexico	private pond near Valley High St SW and NM-303	2019-05-30	35.007	-106.666	liver (frozen); whole organism (isopropanol 40%)	private pond near Valley High St SW and NM-303	30	5	2019	Bernalillo County	PV261983	1
http://arctosdb.org/home/data/; http://creativecommons.org/licenses/by-nc/3.0	https://arctos.database.museum/guid/MSB:Herp:73441	29650820	MSB:Herp:73441	Rana catesbeiana	collector number TBC 16 | field number MSB Field 6512	New Mexico	Little Creek	2007-07-20	33.2008	-108.217	tissue (ethanol 95%); whole organism (isopropanol 40%)	Little Creek	20	7	2007	Catron County	PV262030	1
http://arctosdb.org/home/data/; http://creativecommons.org/licenses/by-nc/3.0	https://arctos.database.museum/guid/MSB:Herp:73445	29650832	MSB:Herp:73445	Rana catesbeiana	collector number TBC 14 | field number MSB Field 6510	New Mexico	Little Creek	2007-07-19	33.2006	-108.218	tissue (ethanol 95%); whole organism (isopropanol 40%)	Little Creek	19	7	2007	Catron County	PV262029	1
http://arctosdb.org/home/data/; http://creativecommons.org/licenses/by-nc/3.0	https://arctos.database.museum/guid/MSB:Herp:73447	29650838	MSB:Herp:73447	Rana catesbeiana	collector number TBC 18 | field number MSB Field 6514	New Mexico	Little Creek	2007-07-20	33.2029	-108.216	tissue (ethanol 95%); whole organism (isopropanol 40%)	Little Creek	20	7	2007	Catron County	PV262031	1
http://arctosdb.org/home/data/; http://creativecommons.org/licenses/by-nc/3.0	https://arctos.database.museum/guid/MSB:Herp:94494	29737073	MSB:Herp:94494	Rana catesbeiana	collector number BLC 917	New Mexico	Beaver Creek, Gila National Forest, head water trib. To E Fork Gila River	2012-09-05	33.3686	-108.12	toe (frozen); whole organism (formalin 5% buffered)	Beaver Creek, Gila National Forest, head water trib. To E Fork Gila River	5	9	2012	Catron County	PV261956	1
http://arctosdb.org/home/data/; http://creativecommons.org/licenses/by-nc/3.0	https://arctos.database.museum/guid/MSB:Herp:106519	30932596	MSB:Herp:106519	Rana catesbeiana	collector number JTG 769 | identifier Raca2115aorcX2	New Mexico	not recorded	2022-09-22	33.0394	-108.538	blood (frozen; slide smear); heart, lung (frozen); liver, muscle (frozen); toe (frozen); whole organism (ethanol; ethanol 70%)	535m W of Gila River, 667m S of Mogollon Creek (on NM-293)	22	9	2022	Grant County	PV261985	1
http://arctosdb.org/home/data/; http://creativecommons.org/licenses/by-nc/3.0	https://arctos.database.museum/guid/MSB:Herp:106518	30932670	MSB:Herp:106518	Rana catesbeiana	collector number JTG 770 | identifier Raca2115aorcX2	New Mexico	not recorded	2022-09-22	33.0394	-108.538	blood (frozen; slide smear); heart, lung (frozen); liver, muscle (frozen); toe (frozen); whole organism (ethanol; ethanol 70%)	535m W of Gila River, 667m S of Mogollon Creek (on NM-293)	22	9	2022	Grant County	PV261986	1
http://arctosdb.org/home/data/; http://creativecommons.org/licenses/by-nc/3.0	https://arctos.database.museum/guid/MSB:Herp:106521	30932810	MSB:Herp:106521	Rana catesbeiana	collector number JTG 768 | identifier Raca2101aorc	New Mexico	not recorded	2022-09-22	33.0225	-108.546	blood (frozen; slide smear); heart, lung (frozen); liver, muscle (frozen); toe (frozen); whole organism (isopropanol 40%)	457m W of Gila River, 297m NE of Upper Gila Site Number Seven Dam (on NM-293)	22	9	2022	Grant County	PV261984	1
http://arctosdb.org/home/data/; http://creativecommons.org/licenses/by-nc/3.0	https://arctos.database.museum/guid/MSB:Herp:107014	31014839	MSB:Herp:107014	Rana catesbeiana	collector number CGA 300	New Mexico	Highway 60, La Joya ditch, close to Bernando Waterfowl Management Area	2022-08-20	34.4188	-106.794	blood (ethanol 95%); toe (ethanol 95%)	Highway 60, La Joya ditch, close to Bernando Waterfowl Management Area	20	8	2022	Socorro County	PV261958	1
http://arctosdb.org/home/data/; http://creativecommons.org/licenses/by-nc/3.0	https://arctos.database.museum/guid/MSB:Herp:107015	31015045	MSB:Herp:107015	Rana catesbeiana	collector number CGA 301	New Mexico	Highway 60, La Joya ditch, close to Bernando Waterfowl Management Area	2022-08-20	34.4188	-106.794	blood (ethanol 95%); toe (ethanol 95%)	Highway 60, La Joya ditch, close to Bernando Waterfowl Management Area	20	8	2022	Socorro County	PV261959	1
http://arctosdb.org/home/data/; http://creativecommons.org/licenses/by-nc/3.0	https://arctos.database.museum/guid/MSB:Herp:108394	31679347	MSB:Herp:108394	Rana catesbeiana	collector number LNB 3387	New Mexico	Hit on US-60	2023 June 29	34.4161	-106.822	DNA; heart, lung (frozen); liver (frozen); liver, muscle (frozen); whole organism (ethanol 70%)	Hit on US-60	29	6	2023	Socorro County	PV262008	1
http://arctosdb.org/home/data/; http://creativecommons.org/licenses/by-nc/3.0	https://arctos.database.museum/guid/MSB:Herp:108438	31905734	MSB:Herp:108438	Rana catesbeiana	Daniele L. F. Wiley collector number DLFW 417	New Mexico	South loop; Bosque del Apache NWR	2023-07-16	33.7867	-106.886	blood (frozen, flash; slide smear); heart, lung (frozen, flash); liver (frozen, flash); liver, muscle (frozen, flash); whole organism	South loop; Bosque del Apache NWR	16	7	2023	Socorro County	PV261979	1
http://arctosdb.org/home/data/; http://creativecommons.org/licenses/by-nc/3.0	https://arctos.database.museum/guid/MSB:Herp:108439	31905740	MSB:Herp:108439	Rana catesbeiana	Daniele L. F. Wiley collector number DLFW 418	New Mexico	Willow Pond vicinity, Bosque del Apache NWR	2023-07-16	33.8489	-106.87	blood (frozen, flash; slide smear); heart, lung (frozen, flash); liver (frozen, flash); liver, muscle (frozen, flash); whole organism	Willow Pond vicinity, Bosque del Apache NWR	16	7	2023	Socorro County	PV261980	1
http://arctosdb.org/home/data/; http://creativecommons.org/licenses/by-nc/3.0	https://arctos.database.museum/guid/MSB:Herp:108424	31905775	MSB:Herp:108424	Rana catesbeiana	Daniele L. F. Wiley collector number DLFW 403	New Mexico	Candelaria Pond, Rio Grande Nature Center	2023-07-10	35.1307	-106.682	blood (frozen, flash; slide smear); heart, lung (frozen, flash); liver (frozen, flash); liver, muscle (frozen, flash); whole organism	In Candelaria pond, Rio Grande Nature Center	10	7	2023	Bernalillo County	PV261965	1
http://arctosdb.org/home/data/; http://creativecommons.org/licenses/by-nc/3.0	https://arctos.database.museum/guid/MSB:Herp:108420	31905781	MSB:Herp:108420	Rana catesbeiana	Daniele L. F. Wiley collector number DLFW 399	New Mexico	Discovery pond- Rio Grande Nature Center	2023-07-10	35.1281	-106.685	blood (frozen, flash; slide smear); heart, lung (frozen, flash); liver (frozen, flash); liver, muscle (frozen, flash); whole organism	Discovery pond- Rio Grande Nature Center	10	7	2023	Bernalillo County	PV261961	1
http://arctosdb.org/home/data/; http://creativecommons.org/licenses/by-nc/3.0	https://arctos.database.museum/guid/MSB:Herp:108433	31905787	MSB:Herp:108433	Rana catesbeiana	Daniele L. F. Wiley collector number DLFW 412	New Mexico	In pond by visitor center; Rio Grande Nature Center	2023-07-10	35.1305	-106.684	blood (frozen, flash; slide smear); heart, lung (frozen, flash); liver (frozen, flash); liver, muscle (frozen, flash); whole organism	In pond by visitor center; Rio Grande Nature Center	10	7	2023	Bernalillo County	PV261974	1
http://arctosdb.org/home/data/; http://creativecommons.org/licenses/by-nc/3.0	https://arctos.database.museum/guid/MSB:Herp:108435	31905794	MSB:Herp:108435	Rana catesbeiana	Daniele L. F. Wiley collector number DLFW 414	New Mexico	In pond by visitor center; Rio Grande Nature Center	2023-07-10	35.131	-106.683	blood (frozen, flash; slide smear); heart, lung (frozen, flash); liver (frozen, flash); liver, muscle (frozen, flash); whole organism	In pond by visitor center; Rio Grande Nature Center	10	7	2023	Bernalillo County	PV261976	1
http://arctosdb.org/home/data/; http://creativecommons.org/licenses/by-nc/3.0	https://arctos.database.museum/guid/MSB:Herp:108436	31905800	MSB:Herp:108436	Rana catesbeiana	Daniele L. F. Wiley collector number DLFW 415	New Mexico	in flood ditch, North loop, Bosque del Apache NWR	2023-07-16	33.8074	-106.864	blood (frozen, flash; slide smear); heart, lung (frozen, flash); liver (frozen, flash); liver, muscle; whole organism	in flood ditch, North loop	16	7	2023	Socorro County	PV261977	1
http://arctosdb.org/home/data/; http://creativecommons.org/licenses/by-nc/3.0	https://arctos.database.museum/guid/MSB:Herp:108419	31905807	MSB:Herp:108419	Rana catesbeiana	Daniele L. F. Wiley collector number DLFW 398	New Mexico	Discovery pond at Rio Grande Nature Center	2023-07-10	35.1281	-106.685	blood (frozen, flash; slide smear); heart, lung (frozen, flash); liver (frozen, flash); liver, muscle (frozen, flash); whole organism	Discovery pond - Rio Grande Nature Center	10	7	2023	Bernalillo County	PV261960	1
http://arctosdb.org/home/data/; http://creativecommons.org/licenses/by-nc/3.0	https://arctos.database.museum/guid/MSB:Herp:108421	31905814	MSB:Herp:108421	Rana catesbeiana	Daniele L. F. Wiley collector number DLFW 400	New Mexico	In pond by visitor center; Rio Grande Nature Center	2023-07-10	35.1317	-106.682	blood (frozen, flash; slide smear); heart, lung (frozen, flash); liver (frozen, flash); liver, muscle (frozen, flash); whole organism	In pond by visiter center; Rio Grande Nature Center	10	7	2023	Bernalillo County	PV261962	1
http://arctosdb.org/home/data/; http://creativecommons.org/licenses/by-nc/3.0	https://arctos.database.museum/guid/MSB:Herp:108422	31905820	MSB:Herp:108422	Rana catesbeiana	Daniele L. F. Wiley collector number DLFW 401	New Mexico	Discovery pond - Rio Grande Nature Center	2023-07-10	35.1282	-106.685	blood (frozen, flash; slide smear); heart, lung (frozen, flash); liver (frozen, flash); liver, muscle (frozen, flash); whole organism	Discovery pond - Rio Grande Nature Center	10	7	2023	Bernalillo County	PV261963	1
http://arctosdb.org/home/data/; http://creativecommons.org/licenses/by-nc/3.0	https://arctos.database.museum/guid/MSB:Herp:108423	31905826	MSB:Herp:108423	Rana catesbeiana	Daniele L. F. Wiley collector number DLFW 402	New Mexico	Candelaria Pond, Rio Grande Nature Center	2023-07-10	35.1307	-106.682	blood (frozen, flash; slide smear); heart, lung (frozen, flash); liver (frozen, flash); liver, muscle (frozen, flash); whole organism	in Candelaria pond - Rio Grande Nature Center	10	7	2023	Bernalillo County	PV261964	1
http://arctosdb.org/home/data/; http://creativecommons.org/licenses/by-nc/3.0	https://arctos.database.museum/guid/MSB:Herp:108425	31905832	MSB:Herp:108425	Rana catesbeiana	Daniele L. F. Wiley collector number DLFW 404	New Mexico	In pond by visitor center; Rio Grande Nature Center	2023-07-10	35.1315	-106.682	blood (frozen, flash; slide smear); heart, lung (frozen, flash); liver (frozen, flash); liver, muscle (frozen, flash); whole organism	In pond by visitor center; Rio Grande Nature Center	10	7	2023	Bernalillo County	PV261966	1
http://arctosdb.org/home/data/; http://creativecommons.org/licenses/by-nc/3.0	https://arctos.database.museum/guid/MSB:Herp:108426	31905839	MSB:Herp:108426	Rana catesbeiana	Daniele L. F. Wiley collector number DLFW 405	New Mexico	In pond by visitor center; Rio Grande Nature Center	2023-07-10	35.1315	-106.682	blood (frozen, flash; slide smear); heart, lung (frozen, flash); liver (frozen, flash); liver, muscle (frozen, flash); whole organism	In pond by visitor center; Rio Grande Nature Center	10	7	2023	Bernalillo County	PV261967	2
http://arctosdb.org/home/data/; http://creativecommons.org/licenses/by-nc/3.0	https://arctos.database.museum/guid/MSB:Herp:108428	31905847	MSB:Herp:108428	Rana catesbeiana	Daniele L. F. Wiley collector number DLFW 407	New Mexico	Candelaria Pond, Rio Grande Nature Center	2023-07-10	35.1307	-106.682	blood (frozen, flash; slide smear); heart, lung (frozen, flash); liver (frozen, flash); liver, muscle (frozen, flash); whole organism	In Candelaria pond, Rio Grande Nature Center	10	7	2023	Bernalillo County	PV261969	2
http://arctosdb.org/home/data/; http://creativecommons.org/licenses/by-nc/3.0	https://arctos.database.museum/guid/MSB:Herp:108427	31905853	MSB:Herp:108427	Rana catesbeiana	Daniele L. F. Wiley collector number DLFW 406	New Mexico	Candelaria pond, Rio Grande Nature Center	2023-July-10	35.1307	-106.682	blood (frozen, flash; slide smear); heart, lung (frozen, flash); liver (frozen, flash); liver, muscle (frozen, flash); whole organism	In Candelaria pond, Rio Grande Nature Center	10	7	2023	Bernalillo County	PV261968	2
http://arctosdb.org/home/data/; http://creativecommons.org/licenses/by-nc/3.0	https://arctos.database.museum/guid/MSB:Herp:108430	31905859	MSB:Herp:108430	Rana catesbeiana	Daniele L. F. Wiley collector number DLFW 409	New Mexico	In pond by visitor center; Rio Grande Nature Center	2023-07-10	35.1306	-106.683	blood (frozen, flash; slide smear); heart, lung (frozen, flash); liver (frozen, flash); liver, muscle (frozen, flash); whole organism	In pond by visitor center; Rio Grande Nature Center	10	7	2023	Bernalillo County	PV261971	1
http://arctosdb.org/home/data/; http://creativecommons.org/licenses/by-nc/3.0	https://arctos.database.museum/guid/MSB:Herp:108431	31905865	MSB:Herp:108431	Rana catesbeiana	Daniele L. F. Wiley collector number DLFW 410	New Mexico	Discovery pond - Rio Grande Nature Center	2023-07-10	35.1278	-106.685	blood (frozen, flash; slide smear); heart, lung (frozen, flash); liver (frozen, flash); liver, muscle (frozen, flash); whole organism	Discovery pond - Rio Grande Nature Center	10	7	2023	Bernalillo County	PV261972	2
http://arctosdb.org/home/data/; http://creativecommons.org/licenses/by-nc/3.0	https://arctos.database.museum/guid/MSB:Herp:108432	31905871	MSB:Herp:108432	Rana catesbeiana	Daniele L. F. Wiley collector number DLFW 411	New Mexico	Discovery pond - Rio Grande Nature Center	2023-07-10	35.128	-106.686	blood (frozen, flash; slide smear); heart, lung (frozen, flash); liver (frozen, flash); liver, muscle (frozen, flash); whole organism	Discovery pond - Rio Grande Nature Center	10	7	2023	Bernalillo County	PV261973	2
http://arctosdb.org/home/data/; http://creativecommons.org/licenses/by-nc/3.0	https://arctos.database.museum/guid/MSB:Herp:108434	31905877	MSB:Herp:108434	Rana catesbeiana	Daniele L. F. Wiley collector number DLFW 413	New Mexico	In pond by visitor center; Rio Grande Nature Center	2023-07-10	35.1309	-106.682	blood (frozen, flash; slide smear); heart, lung (frozen, flash); liver (frozen, flash); liver, muscle (frozen, flash); whole organism	In pond by visitor center; Rio Grande Nature Center	10	7	2023	Bernalillo County	PV261975	1
http://arctosdb.org/home/data/; http://creativecommons.org/licenses/by-nc/3.0	https://arctos.database.museum/guid/MSB:Herp:108437	31905883	MSB:Herp:108437	Rana catesbeiana	Daniele L. F. Wiley collector number DLFW 416	New Mexico	in flood ditch, North loop, Bosque del Apache NWR	2023-07-16	33.8074	-106.864	blood (frozen, flash; slide smear); heart, lung (frozen, flash); liver (frozen, flash); liver, muscle (frozen, flash); whole organism	in flood ditch, North loop	16	7	2023	Socorro County	PV261978	1
http://arctosdb.org/home/data/; http://creativecommons.org/licenses/by-nc/3.0	https://arctos.database.museum/guid/MSB:Herp:108429	31905890	MSB:Herp:108429	Rana catesbeiana	Daniele L. F. Wiley collector number DLFW 408	New Mexico	Candelaria Pond, Rio Grande Nature Center	2023-July-10	35.1307	-106.682	blood (frozen, flash; slide smear); heart, lung (frozen, flash); liver (frozen, flash); liver, muscle (frozen, flash); whole organism	In Candelaria pond, Rio Grande Nature Center	10	7	2023	Bernalillo County	PV261970	1
http://arctosdb.org/home/data/; http://creativecommons.org/licenses/by-nc/3.0	https://arctos.database.museum/guid/MSB:Herp:108486	31932875	MSB:Herp:108486	Rana catesbeiana	J. Tomasz Giermakowski collector number JTG 813	New Mexico	NM 15 bridge S of GICL Visitor Center	2023-08-15	33.2219	-108.242	liver, muscle (frozen, flash); whole organism (ethanol 70%)	NM 15 bridge S of GICL Visitor Center	15	8	2023	Catron County	PV261997	1
http://arctosdb.org/home/data/; http://creativecommons.org/licenses/by-nc/3.0	https://arctos.database.museum/guid/MSB:Herp:108475	31932880	MSB:Herp:108475	Rana catesbeiana	J. Tomasz Giermakowski collector number JTG 802	New Mexico	Middle Fork Gila River, first river crossing on Trail #157	2023-08-15 10:47:00	33.2276	-108.238	liver, muscle (frozen, flash); whole organism (ethanol 70%)	Middle Fork Gila River, first river crossing on Trail #157	15	8	2023	Catron County	PV261988	1
http://arctosdb.org/home/data/; http://creativecommons.org/licenses/by-nc/3.0	https://arctos.database.museum/guid/MSB:Herp:108477	31932883	MSB:Herp:108477	Rana catesbeiana	J. Tomasz Giermakowski collector number JTG 804	New Mexico	Middle Fork Gila River, second river crossing on Trail #157	2023-08-15 11:32:00	33.2307	-108.236	liver, muscle (frozen, flash); whole organism (ethanol 70%)	Middle Fork Gila River, second river crossing on Trail #157	15	8	2023	Catron County	PV261990	1
http://arctosdb.org/home/data/; http://creativecommons.org/licenses/by-nc/3.0	https://arctos.database.museum/guid/MSB:Herp:108487	31932886	MSB:Herp:108487	Rana catesbeiana	J. Tomasz Giermakowski collector number JTG 814	New Mexico	NM 15 bridge S of GICL Visitor Center	2023-08-15	33.2219	-108.242	liver, muscle (frozen, flash); whole organism (ethanol 70%)	NM 15 bridge S of GICL Visitor Center	15	8	2023	Catron County	PV261998	1
http://arctosdb.org/home/data/; http://creativecommons.org/licenses/by-nc/3.0	https://arctos.database.museum/guid/MSB:Herp:108478	31932896	MSB:Herp:108478	Rana catesbeiana	J. Tomasz Giermakowski collector number JTG 805	New Mexico	Middle Fork Gila River, second river crossing on Trail #157	2023-08-15 11:32:00	33.2307	-108.236	liver, muscle (frozen, flash); whole organism (ethanol 70%)	Middle Fork Gila River, second river crossing on Trail #157	15	8	2023	Catron County	PV261991	1
http://arctosdb.org/home/data/; http://creativecommons.org/licenses/by-nc/3.0	https://arctos.database.museum/guid/MSB:Herp:108474	31932905	MSB:Herp:108474	Rana catesbeiana	J. Tomasz Giermakowski collector number JTG 801	New Mexico	Middle Fork Gila River, first river crossing on Trail #157	2023-08-15 10:47:00	33.2276	-108.238	liver, muscle (frozen, flash); whole organism (ethanol 70%)	Middle Fork Gila River, first river crossing on Trail #157	15	8	2023	Catron County	PV261987	1
http://arctosdb.org/home/data/; http://creativecommons.org/licenses/by-nc/3.0	https://arctos.database.museum/guid/MSB:Herp:108476	31932912	MSB:Herp:108476	Rana catesbeiana	J. Tomasz Giermakowski collector number JTG 803	New Mexico	Middle Fork Gila River, second river crossing on Trail #157	2023-08-15 11:32:00	33.2307	-108.236	liver, muscle (frozen, flash); whole organism (ethanol 70%)	Middle Fork Gila River, second river crossing on Trail #157	15	8	2023	Catron County	PV261989	1
http://arctosdb.org/home/data/; http://creativecommons.org/licenses/by-nc/3.0	https://arctos.database.museum/guid/MSB:Herp:108480	31932915	MSB:Herp:108480	Rana catesbeiana	J. Tomasz Giermakowski collector number JTG 807	New Mexico	Middle Fork Gila River, second river crossing on Trail #157	2023-08-15 11:32:00	33.2307	-108.236	liver, muscle (frozen, flash); whole organism (ethanol 70%)	Middle Fork Gila River, second river crossing on Trail #157	15	8	2023	Catron County	PV261992	1
http://arctosdb.org/home/data/; http://creativecommons.org/licenses/by-nc/3.0	https://arctos.database.museum/guid/MSB:Herp:108481	31932918	MSB:Herp:108481	Rana catesbeiana	J. Tomasz Giermakowski collector number JTG 808	New Mexico	Middle Fork Gila River, second river crossing on Trail #157	2023-08-15 11:32:00	33.2307	-108.236	liver, muscle (frozen, flash); whole organism (ethanol 70%)	Middle Fork Gila River, second river crossing on Trail #157	15	8	2023	Catron County	PV261993	1
http://arctosdb.org/home/data/; http://creativecommons.org/licenses/by-nc/3.0	https://arctos.database.museum/guid/MSB:Herp:108482	31932924	MSB:Herp:108482	Rana catesbeiana	J. Tomasz Giermakowski collector number JTG 809	New Mexico	Middle Fork Gila River, floodplain NE of trailhead #157	2023-08-15 21:12:00	33.2274	-108.239	blood (frozen, flash; slide smear); heart, lung (frozen, flash); liver (frozen, flash); liver, muscle (frozen, flash); whole organism (ethanol 70%)	Middle Fork Gila River, floodplain NE of trailhead #157	15	8	2023	Catron County	PV261994	1
http://arctosdb.org/home/data/; http://creativecommons.org/licenses/by-nc/3.0	https://arctos.database.museum/guid/MSB:Herp:108483	31932931	MSB:Herp:108483	Rana catesbeiana	J. Tomasz Giermakowski collector number JTG 810	New Mexico	Middle Fork Gila River, floodplain NE of trailhead #157	2023-08-15 21:11:00	33.2274	-108.239	blood (frozen, flash; slide smear); heart, lung (frozen, flash); liver (frozen, flash); liver, muscle (frozen, flash); whole organism (ethanol 70%)	Middle Fork Gila River, floodplain NE of trailhead #157	15	8	2023	Catron County	PV261995	1
http://arctosdb.org/home/data/; http://creativecommons.org/licenses/by-nc/3.0	https://arctos.database.museum/guid/MSB:Herp:108484	31932938	MSB:Herp:108484	Rana catesbeiana	J. Tomasz Giermakowski collector number JTG 811	New Mexico	Middle Fork Gila River, 100m SSW of Hot Springs	2023-08-15 11:52:00	33.2327	-108.236	liver, muscle (frozen, flash); whole organism (ethanol 70%)	Middle Fork Gila River, 100m SSW of Hot Springs	15	8	2023	Catron County	PV261996	1
http://arctosdb.org/home/data/; http://creativecommons.org/licenses/by-nc/3.0	https://arctos.database.museum/guid/MSB:Herp:108491	31932948	MSB:Herp:108491	Rana catesbeiana	J. Tomasz Giermakowski collector number JTG 818	New Mexico	Middle Fork Gila River, floodplain NE of trailhead #157	2023-08-15 21:01:00	33.2274	-108.238	blood (frozen, flash; slide smear); heart, lung (frozen, flash); liver (frozen, flash); liver, muscle (frozen, flash); whole organism (ethanol 70%)	Middle Fork Gila River, floodplain NE of trailhead #157	15	8	2023	Catron County	PV261999	1
http://arctosdb.org/home/data/; http://creativecommons.org/licenses/by-nc/3.0	https://arctos.database.museum/guid/MSB:Herp:108492	31932959	MSB:Herp:108492	Rana catesbeiana	J. Tomasz Giermakowski collector number JTG 819	New Mexico	Middle Fork Gila River, floodplain NE of trailhead #157	2023-08-15 20:48:00	33.2276	-108.237	blood (frozen, flash; slide smear); heart, lung (frozen, flash); liver (frozen, flash); liver, muscle (frozen, flash); whole organism (ethanol 70%)	Middle Fork Gila River, floodplain NE of trailhead #157	15	8	2023	Catron County	PV262000	1
http://arctosdb.org/home/data/; http://creativecommons.org/licenses/by-nc/3.0	https://arctos.database.museum/guid/MSB:Herp:108493	31932966	MSB:Herp:108493	Rana catesbeiana	J. Tomasz Giermakowski collector number JTG 820	New Mexico	Middle Fork Gila River, floodplain NE of trailhead #157	2023-08-15 21:01:00	33.2274	-108.238	blood (frozen, flash; slide smear); heart, lung (frozen, flash); liver (frozen, flash); liver, muscle (frozen, flash); whole organism (ethanol 70%)	Middle Fork Gila River, floodplain NE of trailhead #157	15	8	2023	Catron County	PV262001	1
http://arctosdb.org/home/data/; http://creativecommons.org/licenses/by-nc/3.0	https://arctos.database.museum/guid/MSB:Herp:108494	31932973	MSB:Herp:108494	Rana catesbeiana	J. Tomasz Giermakowski collector number JTG 821	New Mexico	Middle Fork Gila River, floodplain NE of trailhead #157	2023-08-15 20:45:00	33.2275	-108.238	blood (frozen, flash; slide smear); heart, lung (frozen, flash); liver (frozen, flash); liver, muscle (frozen, flash); whole organism (ethanol 70%)	Middle Fork Gila River, floodplain NE of trailhead #157	15	8	2023	Catron County	PV262002	1
http://arctosdb.org/home/data/; http://creativecommons.org/licenses/by-nc/3.0	https://arctos.database.museum/guid/MSB:Herp:108495	31932980	MSB:Herp:108495	Rana catesbeiana	J. Tomasz Giermakowski collector number JTG 822	New Mexico	Middle Fork Gila River, floodplain NE of trailhead #157	2023-08-15 21:22:00	33.2273	-108.239	blood (frozen, flash; slide smear); heart, lung (frozen, flash); liver (frozen, flash); liver, muscle (frozen, flash); whole organism (ethanol 70%)	Middle Fork Gila River, floodplain NE of trailhead #157	15	8	2023	Catron County	PV262003	1
http://arctosdb.org/home/data/; http://creativecommons.org/licenses/by-nc/3.0	https://arctos.database.museum/guid/MSB:Herp:108496	31932987	MSB:Herp:108496	Rana catesbeiana	J. Tomasz Giermakowski collector number JTG 823	New Mexico	West Fork Gila River at NM-15 bridge	2023-08-15 22:27:00	33.2219	-108.242	blood (frozen, flash; slide smear); heart, lung (frozen, flash); liver (frozen, flash); liver, muscle (frozen, flash); whole organism (ethanol 70%)	West Fork Gila River at NM-15 bridge	15	8	2023	Catron County	PV262004	1
http://arctosdb.org/home/data/; http://creativecommons.org/licenses/by-nc/3.0	https://arctos.database.museum/guid/MSB:Herp:108497	31932994	MSB:Herp:108497	Rana catesbeiana	J. Tomasz Giermakowski collector number JTG 824	New Mexico	Middle Fork Gila River, floodplain NE of trailhead #157	2023-08-15 21:19:00	33.2272	-108.239	blood (frozen, flash; slide smear); heart, lung (frozen, flash); liver (frozen, flash); liver, muscle (frozen, flash); whole organism (ethanol 70%)	Middle Fork Gila River, floodplain NE of trailhead #157	15	8	2023	Catron County	PV262005	1
http://arctosdb.org/home/data/; http://creativecommons.org/licenses/by-nc/3.0	https://arctos.database.museum/guid/MSB:Herp:108498	31933001	MSB:Herp:108498	Rana catesbeiana	J. Tomasz Giermakowski collector number JTG 825	New Mexico	Middle Fork Gila River, first river crossing on Trail #157	2023-08-15 20:50:00	33.2276	-108.237	blood (frozen, flash; slide smear); heart, lung (frozen, flash); liver (frozen, flash); liver, muscle (frozen, flash); whole organism (ethanol 70%)	Middle Fork Gila River, first river crossing on Trail #157	15	8	2023	Catron County	PV262006	1
http://arctosdb.org/home/data/; http://creativecommons.org/licenses/by-nc/3.0	https://arctos.database.museum/guid/MSB:Herp:108514	31933062	MSB:Herp:108514	Rana catesbeiana	J. Tomasz Giermakowski collector number JTG 841	New Mexico	West Fork Gila River, 400m E of E E Canyon	2023-08-16 10:38:00	33.2387	-108.279	whole organism (ethanol 70%; frozen, flash)	West Fork Gila River, 400m E of E E Canyon	16	8	2023	Catron County	PV262007	1

## Sheet: Sample_data_Metadata
use_license_url	license URL
hyperlink	Arctos link to each specimen
collection_object_id	frog ID number
guid	MSB catalogue number assigned at MSB Division of Amphibians and Reptiles
scientific_name	Scientific name according to The Center for North American Herpetology and Amphibia web
othercatalognumbers	field number and/or collector listed
state_prov	state the frog was collected
spec_locality	Locality as described by field collectors or inferred through Geolocate using coordinates
verbatim_date	date written by field collector
dec_lat	latitude according to GPS
dec_long	longitude according to GPS
parts	tissue used for project including the preservation
verbatim_locality	Locality as described by field collector notes
day_collected	day frog was collected
month_collected	month frog was collected
year_collected	year frog was collected
county	county frog was collected
Genbank_id	assigned by Genbank, unique ID to specific sequence
Lineage	inferred by phylogeny
