# Supplementary material for: Elucidating the invasion history of introduced bullfrogs in New Mexico using population genetic approaches
Source: PeerJ. 2026 Jan 9;14:e20491. doi: 10.7717/peerj.20491 (PMC12794634; doi:10.7717/peerj.20491)
Supplement: Supplemental Information 3 — The data for sequences per site used in the study including diversity indices, sample sizes and geographical data. This also exhibits the number of populations compared, the AMOVA region, and which study each population was from. [file peerj-14-20491-s003.xlsx]

## Sheet: Sequences_cytb_data
Supporting information for manuscript submitted to Biological Invasions
Elucidating the invasion history of introduced bullfrogs in New Mexico using population genetic approaches Celina M. Eberle¹*, ceberle17@unm.edu; https://orcid.org/0009-0001-5857-2445 Daniele L. F. Wiley¹, dwiley7@unm.edu; https://orcid.org/0000-0003-0042-0825 Chris X. McDaniels¹, cmcdaniels1@unm.edu: https://orcid.org/0009-0004-1683-2423 J. Tomasz Giermakowski¹, tomas@unm.edu; https://orcid.org/…
Table S2. This file contains the data for sequences per site used in the study including diversity indices, sample sizes, and geographical data. The file also exhibits the number of populations compared, the AMOVA region, and which study each population was from.
Pop_Num	Study	Status	Site_Code	Country	Population_Locality	Region_AMOVA	State_Province	Latitude	Longitude	Sample_Size	N_Haplotypes	Hap_Div	Nuc_Div
1	This study	Invasive	ABQ	United States	Albuquerque	New Mexico	New Mexico	35.1281	-106.685	18	6	0.83	0.009
2	This study	Invasive	SC	United States	Socorro	New Mexico	New Mexico	34.4188	-106.794	3	2	0.667	0.0014
3	This study	Invasive	BDA	United States	Bosque del Apache	New Mexico	New Mexico	33.8074	-106.864	4	2	0.5	0.0011
4	This study	Invasive	UGR	United States	Upper Gila River	New Mexico	New Mexico	33.2276	-108.238	33	2	0.435	0.0009
5	This study	Invasive	CF	United States	Cliff	New Mexico	New Mexico	33.0225	-108.546	4	3	0.833	0.0034
6	This study	Invasive	RO	United States	Rodeo	New Mexico	New Mexico	31.8704	-109.035	14	1	0	0
7	This study	Invasive	MR	United States	Mora River	New Mexico	New Mexico	35.7833	-104.99	1	1	NA	NA
8	Ficetola et al. 2008	Invasive	BE1	Belgium	Geel, Antwerpen	NA	Europe	no coords	no coords	8	2	0.429	0.0028
9	Ficetola et al. 2008	Invasive	FR2	France	Gironde	NA	Europe	no coords	no coords	37	1	0	0
10	Ficetola et al. 2008	Invasive	FR3	France	Dordogne	NA	Europe	no coords	no coords	16	1	0	0
11	Ficetola et al. 2008	Invasive	FR4	France	Savoie	NA	Europe	no coords	no coords	1	1	0	0
12	Ficetola et al. 2008	Invasive	FR5	France	Loir-et-Cher	NA	Europe	no coords	no coords	17	1	0	0
13	Ficetola et al. 2008	Invasive	GE6	Germany	Baden-Württemberg	NA	Europe	no coords	no coords	23	1	0	0
14	Ficetola et al. 2008	Invasive	GE7	Germany	Crete	NA	Europe	no coords	no coords	5	2	0.6	0.0082
15	Ficetola et al. 2008	Invasive	IT8	Italy	River Po Lowland	NA	Europe	no coords	no coords	19	1	0	0
16	Ficetola et al. 2008	Invasive	IT9	Italy	Cameri, Piedmont	NA	Europe	no coords	no coords	4	1	0	0
17	Ficetola et al. 2008	Invasive	IT10	Italy	Valfenera, Piedmont	NA	Europe	no coords	no coords	19	1	0	0
18	Ficetola et al. 2008	Invasive	IT11	Italy	Tuscany	NA	Europe	no coords	no coords	14	1	0	0
19	Ficetola et al. 2008	Invasive	UK12	U.K.	Kent-Sussex border	NA	Europe	no coords	no coords	11	1	0	0
20	Funk et al. 2011	Invasive	AK	United States	Ankeny	Northwest	Oregon	44.7762	-123.087	5	4	0.9	0.0096
21	Funk et al. 2011	Invasive	WP1	United States	Wilson pond 1	Northwest	Oregon	44.6884	-123.21	5	1	0	0
22	Funk et al. 2011	Invasive	WP2	United States	Wilson pond 2	Northwest	Oregon	44.69	-123.209	4	2	0.5	0.0086
23	Funk et al. 2011	Invasive	WP3	United States	Wilson pond 3	Northwest	Oregon	44.7066	-123.212	5	2	0.4	0.0069
24	Funk et al. 2011	Invasive	WP4	United States	Wilson pond 4	Northwest	Oregon	44.7187	-123.215	5	2	0.4	0.0069
25	Funk et al. 2011	Invasive	FP1	United States	Finley pond 1	Northwest	Oregon	44.4207	-123.316	5	2	0.4	0.0078
26	Funk et al. 2011	Invasive	FP2	United States	Finley pond 2	Northwest	Oregon	44.4021	-123.323	5	2	0.6	0.0118
27	Funk et al. 2011	Invasive	SB	United States	Scottsburg	Northwest	Oregon	43.651	-123.837	1	1	0	0
28	Kamath et al. 2016	Invasive	BR	United States	Bitterroot River	Northwest	Montana	46.5233	-114.105	40	3	0.651	0.011
29	Kamath et al. 2016	Invasive	FR	United States	Flathead River	Northwest	Montana	47.3933	-114.569	5	1	0	0
30	Kamath et al. 2016	Invasive	TR	United States	Tongue River	Northwest	Montana	45.3392	-106.318	15	1	0	0
31	Kamath et al. 2016	Invasive	YR	United States	Yellowstone River	Northwest	Montana	45.9954	-108.05	308	2	0.5	0.003
32	Kamath et al. 2016	Native	GTNP	United States	Grand Teton NP	Northwest	Wyoming	43.6401	-110.623	27	1	0	0
33	LaFond et al. 2022	Native	SLIL	United States	NA	Overlap	Illinois	40.4488	-89.8953	10	3	0.711	0.00117
34	LaFond et al. 2022	Native	FHKY	United States	NA	Overlap	Kentucky	38.12	-83.5405	11	4	0.745	0.01037
35	LaFond et al. 2022	Native	BRAL	United States	NA	Overlap	Alabama	34.5561	-86.7773	12	5	0.788	0.00406
36	LaFond et al. 2022	Native	SLVA	United States	NA	East	Virginia	36.7124	-76.2803	10	3	0.711	0.00387
37	LaFond et al. 2022	Native	SPMD	United States	NA	East	Maryland	39.0466	-76.7955	9	5	0.806	0.00394
38	LaFond et al. 2022	Native	GVFL	United States	NA	East	Florida	29.632	-82.395	13	2	0.167	0.00018
39	LaFond et al. 2022	Native	ENGA	United States	NA	East	Georgia	31.3909	-83.3601	16	8	0.895	0.00534
40	LaFond et al. 2022	Native	ALGA	United States	NA	East	Georgia	31.4282	-83.2489	13	5	0.705	0.00429
41	LaFond et al. 2022	Native	SFNY	United States	NA	Northeast	New York	42.8924	-76.7545	22	5	0.684	0.00512
42	LaFond et al. 2022	Native	GHFL	United States	NA	East	Florida	29.8253	-81.9541	85	3	0.494	0.00071
43	LaFond et al. 2022	Invasive	CDAZ	United States	NA	Southwest	Arizona	31.8735	-109.053	28	1	0	0
44	LaFond et al. 2022	Invasive	FLAZ	United States	NA	Southwest	Arizona	32.2611	-110.87	8	3	0.75	0.00277
45	LaFond et al. 2022	Invasive	BCAZ	United States	NA	Southwest	Arizona	34.0705	-112.151	12	2	0.182	0.00041
46	LaFond et al. 2022	Invasive	WWAZ	United States	NA	Southwest	Arizona	34.5787	-112.427	18	3	0.702	0.00174
47	LaFond et al. 2022	Invasive	SCCA	United States	NA	Southwest	California	33.1978	-116.755	35	2	0.487	0.0006
48	LaFond et al. 2022	Invasive	RJCA	United States	NA	Southwest	California	32.6771	-116.865	20	3	0.279	0.00096
49	LaFond et al. 2022	Invasive	HPCA	United States	NA	Southwest	California	32.8688	-116.899	25	4	0.552	0.00171
50	LaFond et al. 2022	Invasive	WVOR	United States	NA	Northwest	Oregon	44.0151	-123.031	30	5	0.628	0.00892
51	LaFond et al. 2022	Invasive	RRID	United States	NA	Northwest	Idaho	NA	NA	30	1	0	0
52	LaFond et al. 2022	Invasive	VLBC	Canada	NA	Northwest	British Colombia	48.4431	-123.526	30	2	0.467	0.00213
53	Austin et al. 2004	Native	Site 1	Canada	St. Lawrence Isl. Natl. Park	NorthEast	Ontario	44.4167	-75.8667	4	1	0	0
54	Austin et al. 2004	Native	Site 2	Canada	Pigeon River	NorthEast	Ontario	44.2667	-75.5833	6	2	0.5333	0.001327
55	Austin et al. 2004	Native	Site 3	Canada	Muskrat River	NorthEast	Ontario	45.7333	-77.0333	6	2	0.3333	0.000829
56	Austin et al. 2004	Native	Site 4	Canada	Bug Gull Lake	NorthEast	Ontario	44.8333	-76.9333	10	2	0.2	0.002595
57	Austin et al. 2004	Native	Site 5	Canada	Aberfoyle Mill Pond, Hwy 6	East	Ontario	43.4667	-80.15	10	1	0	0
58	Austin et al. 2004	Native	Site 6	Canada	Mud Lake	NorthEast	Ontario	42.9333	-79.25	6	2	0.3333	0.001441
59	Austin et al. 2004	Native	Site 7	Canada	Little Lake Joseph, RR 362	East	Ontario	45.2	-79.6667	6	2	0.3333	0.000831
60	Austin et al. 2004	Native	Site 8	Canada	St. Clair Natl. Wildlife Area	Overlap	Ontario	42.3833	-82.4	7	4	0.7143	0.010318
61	Austin et al. 2004	Native	Site 9	Canada	Big Creek Natl. Wildlife Area	East	Ontario	42.5833	-80.45	8	3	0.7143	0.004334
62	Austin et al. 2004	Native	Site 10	United States	Sterling State Park	Overlap	Michigan	41.9167	-83.3333	3	2	0.6667	0.005056
63	Austin et al. 2004	Native	Site 11	United States	Duck Lake	Overlap	Michigan	42.4	-85.3833	6	2	0.3333	0.00036
64	Austin et al. 2004	Native	Site 12	United States	Lake Alma State Park	Overlap	Ohio	39.15	-82.5167	4	2	0.5	0.010293
65	Austin et al. 2004	Native	Site 13	United States	Holden Arboretum	Overlap	Ohio	41.6167	-81.3	5	3	0.8	0.012469
66	Austin et al. 2004	Native	Site 14	United States	Middle Fork State Fish and Wildlife Area, Rd 2350, N of Route 74	Overlap	Illinois	40.1833	-87.7333	5	2	0.4	0.008111
67	Austin et al. 2004	Native	Site 15	United States	Long Lake	NorthEast	Maine	44.0366	-70.6594	1	1	1	0
68	Austin et al. 2004	Native	Site 16	United States	Saratoga Lake	NorthEast	New York	43.0167	-73.75	6	3	0.7333	0.000829
69	Austin et al. 2004	Native	Site 17	United States	Lake Independence	NorthEast	Pennsylvania	41.15	-76.0167	3	1	0	0
70	Austin et al. 2004	Native	Site 18	United States	Baskett Research Area, E. Shelton Lane	Overlap	Missouri	38.75	-92.2	4	3	0.8333	0.009975
71	Austin et al. 2004	Native	Site 19	United States	Lake Paho, Route 136	West	Missouri	40.4	-93.65	5	3	0.7	0.003247
72	Austin et al. 2004	Native	Site 20	United States	NESA	West	Kansas	39.05	-95.1833	5	3	0.7	0.00798
73	Austin et al. 2004	Native	Site 21	United States	Norman	West	Oklahoma	35.2	-97.4333	5	1	0	0
74	Austin et al. 2004	Native	Site 22	United States	Route 127 at Indian Gap Rd.	Overlap	Kentucky	38.3167	-84.85	5	3	0.7	0.00798
75	Austin et al. 2004	Native	Site 23	United States	Sloughs Wildlife Management Area, Sauerherber Unit	Overlap	Kentucky	37.85	-87.7833	7	3	0.6667	0.002138
76	Austin et al. 2004	Native	Site 24	United States	St. Mary's University Campus	NorthEast	Maryland	38.1833	-76.4333	4	2	0.5	0.001244
77	Austin et al. 2004	Native	Site 25	United States	Augusta County	East	Virginia	37.9833	-78.9833	6	2	0.3333	0.00325
78	Austin et al. 2004	Native	Site 26	United States	Otter Lake	East	Virginia	37.55	-79.35	2	2	1	0.008667
79	Austin et al. 2004	Native	Site 27	United States	Arnold Air Force Base	Overlap	Tennessee	35.4167	-86.05	5	3	0.7	0.010618
80	Austin et al. 2004	Native	Site 28	United States	Mason Farm	East	North Carolina	35.9	-79	6	2	0.3333	0.002889
81	Austin et al. 2004	Native	Site 29	United States	Starkville	Overlap	Mississippi	33.4167	-88.7833	4	3	0.8333	0.013716
82	Austin et al. 2004	Native	Site 30	United States	Ross Barnett Reservoir, Lake Harbor Road	Overlap	Mississippi	32.5333	-89.9	5	4	0.9	0.009975
83	Austin et al. 2004	Native	Site 31	United States	L'Anguille, CR 221 and CR 220	West	Arkansas	35.6667	-90.7167	6	3	0.8667	0.003159
84	Austin et al. 2004	Native	Site 32	United States	Dumas, Route 165 between Bayou and Canal #43	West	Arkansas	33.8833	-91.4167	6	3	0.6	0.002494
85	Austin et al. 2004	Native	Site 33	United States	Walker Mines, Haul Road	Overlap	Alabama	33.3167	-87.3333	5	3	0.9	0.013466
86	Austin et al. 2004	Native	Site 34	United States	Tyler	West	Texas	33.7833	-95.5667	6	2	0.3333	0.00036
87	Austin et al. 2004	Native	Site 35	United States	Waccamaw River at Lake Waccamaw	East	North Carolina	34.2667	-78.5096	1	1	1	0
88	Austin et al. 2004	Native	Site 36	United States	Tsinia Wildlife Viewing Area, Tuskasgee National Forest	East	Alabama	32.45	-85.65	5	5	1	0.004988
89	Austin et al. 2004	Native	Site 37	United States	Leon	East	Florida	30.4167	-84	3	3	1	0.004988
90	Austin et al. 2004	Native	Site 38	United States	NW 71st St., Gainesville	East	Florida	29.7333	-82.4167	8	2	0.25	0.001247
91	Austin et al. 2004	Native	Site 39	United States	Savannah-Ogeechee Canal	East	Georgia	32.0167	-81.2667	2	1	0	0
92	Austin et al. 2004	Native	Site 40	United States	Reed Bingham State Park	East	Georgia	31.1667	-83.55	3	2	0.6667	0.004334
93	Austin et al. 2004	Native	Site 41	United States	Piedmont College, Demorest	East	Georgia	34.5667	-83.55	4	1	0	0
94	Austin et al. 2004	Native	Site 42	United States	Thompson Mills Forest, Athens	East	Georgia	33.5833	-83.3667	7	3	0.5238	0.005572
